# Supplementary material for: Transcriptomic analysis reveals inhibition of androgen receptor activity by AMPK in prostate cancer cells
Source: PubMed Central journal article supplement (PMC4116520; doi:10.18632/oncotarget.1997), 2014-05-21
Supplement: oncotarget-05-3785-s001.pdf [file oncotarget-05-3785-s001.pdf]

# Transcriptomic analysis reveals inhibition of androgen receptor activity by AMPK in prostate cancer cells

## Supplementary Material

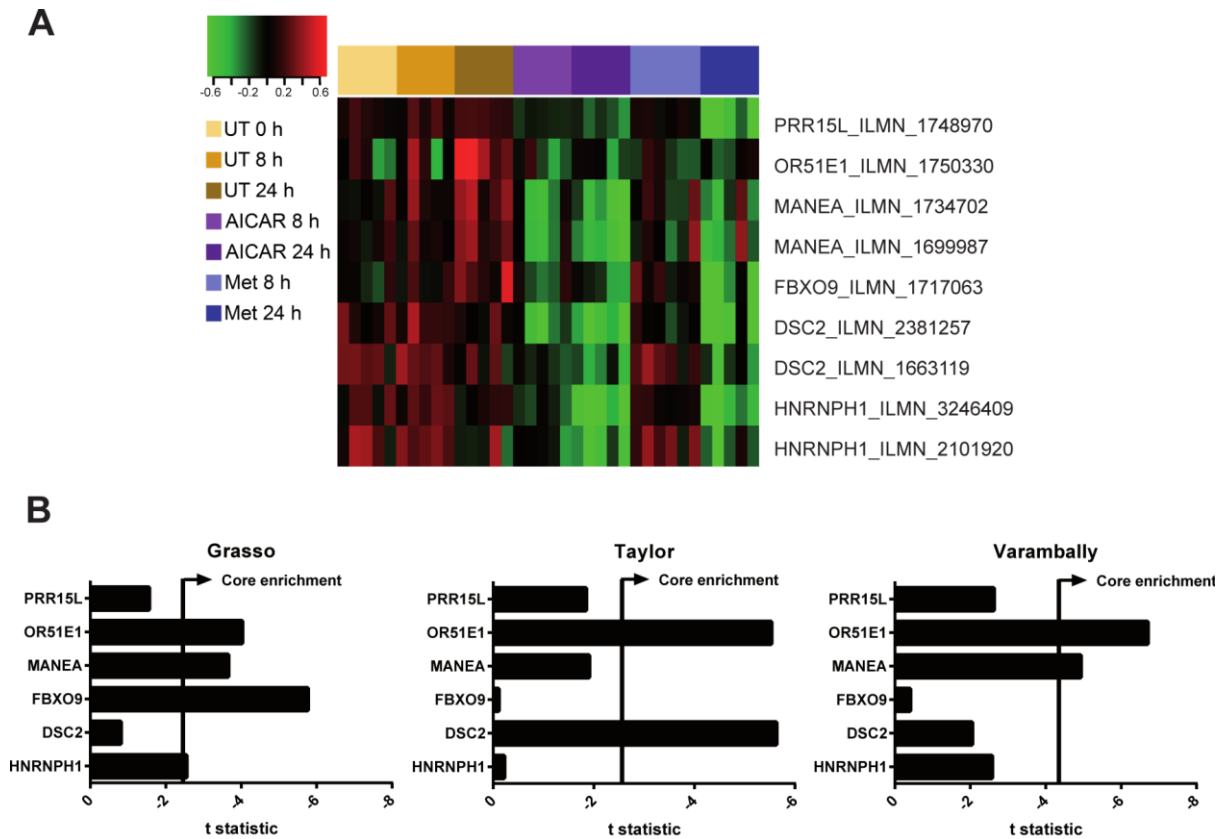

**Supplementary Figure 1: Genes downregulated by AMPK are overexpressed in prostate cancer.** **A:** Examples of six genes downregulated by AMPK activation. Heatmap shows expression of six selected genes in the expression array. **B:** AMPK repressed genes are overexpressed in prostate cancer.  $t$  statistics for the six genes in the Grasso, Taylor and Varambally datasets comparing expression in primary cancer to expression in benign/normal tissue are shown. Negative values indicate upregulation in primary cancer. Cut-offs for genes contributing to the core enrichment according to GSEA are indicated.

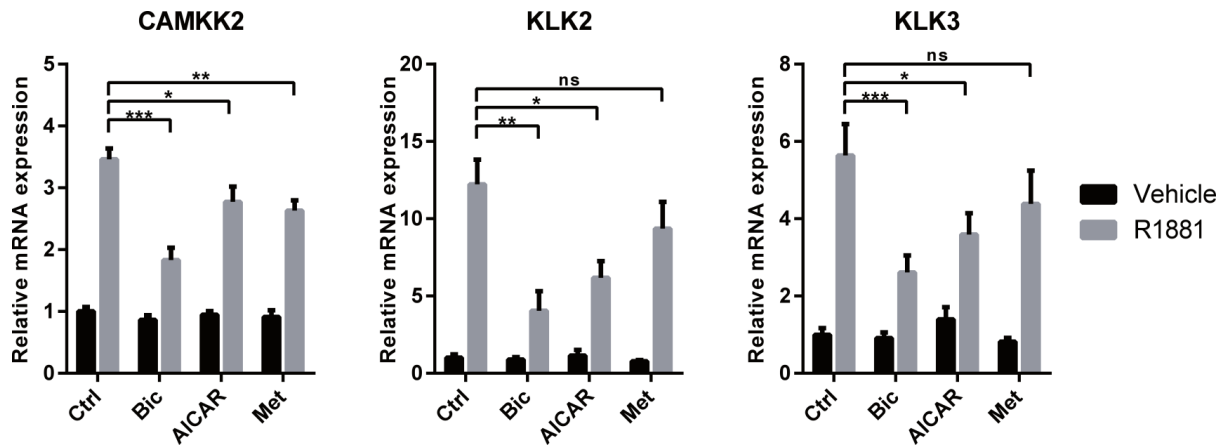

**Supplementary Figure 2: Reduced R1881-induction of AR target genes in LNCaP cells following AMPK activation.** To assess effects of AMPK activation on induction of endogenous AR-target genes by R1881, C4-2 cells were grown in androgen-free medium for three days and stimulated with R1881 and bicalutamide, AICAR or metformin for 12 h. mRNA expression was assessed by qRT-PCR; values are depicted relative to vehicle control. n=4 for *CAMKK2* and *KLK3*, n=3 for *KLK2*.

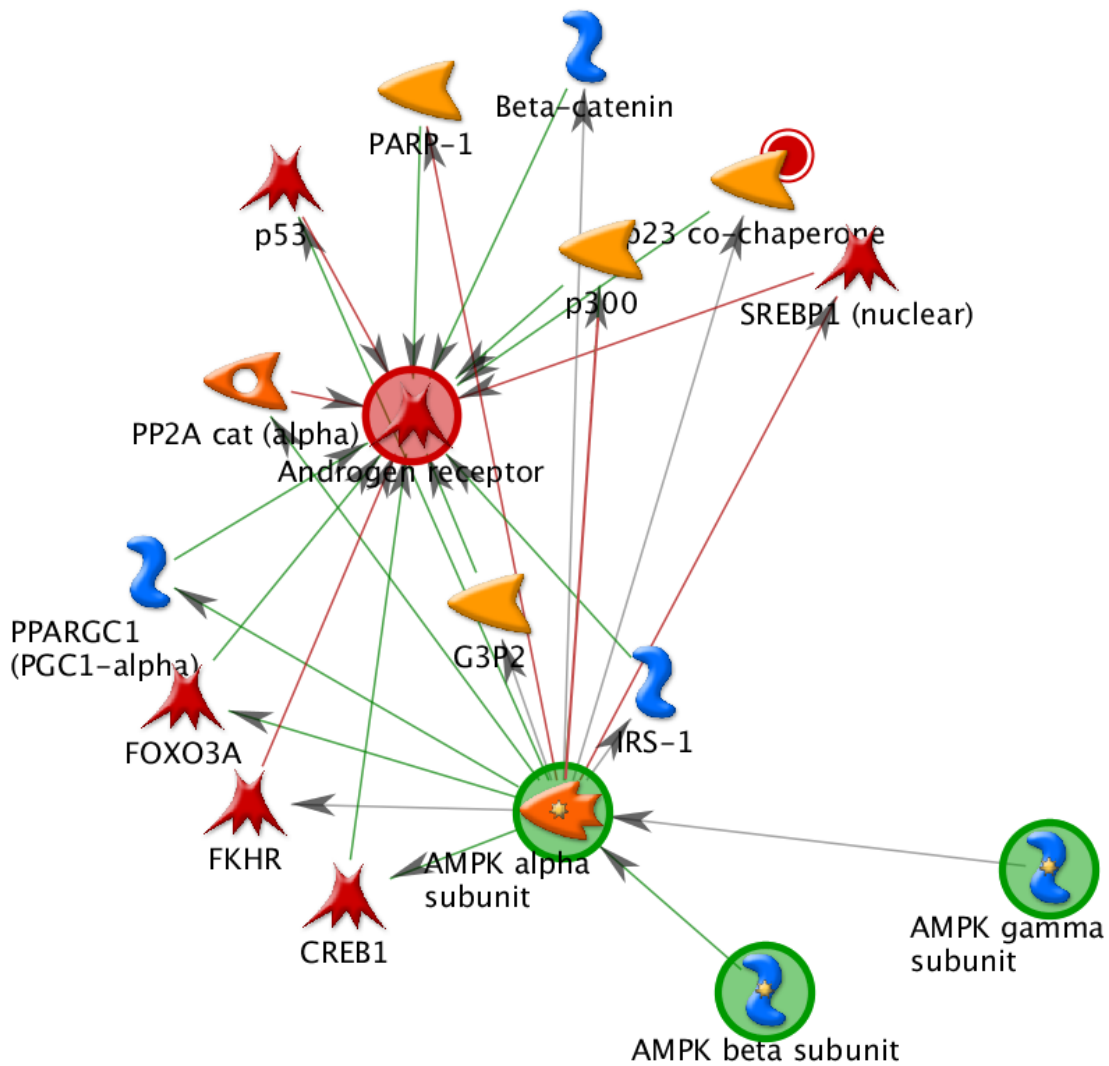

**Supplementary Figure 3: A complex network of signalling pathways links AMPK to regulation of AR activity.** Potential links between AMPK and AR were predicted using MetaCore. Image was generated with MetaCore, manually checked against literature and edited where required.

**Supplementary Table 1: AMPK regulated genes resembles gene expression signatures associated with PI3K/Akt/mTor pathway inhibition.** AMPK regulated genes were compared to gene-expression signatures associated with 1,309 bioactive small molecules using Connectivity Map 02. Table shows top 10 most significant hits.

| <b>Rank</b> | <b>cmap Name</b> | <b>p-value</b> | <b>Comment</b>                 |
|-------------|------------------|----------------|--------------------------------|
| <b>1</b>    | 5224221          | < 0.00001      |                                |
| <b>2</b>    | thioridazine     | < 0.00001      | inhibits PI3K/Akt/mTOR pathway |
| <b>3</b>    | wortmannin       | < 0.00001      | inhibits PI3K/Akt/mTOR pathway |
| <b>4</b>    | LY-294002        | < 0.00001      | inhibits PI3K/Akt/mTOR pathway |
| <b>5</b>    | trichostatin A   | < 0.00001      |                                |
| <b>6</b>    | loperamide       | 0.00002        |                                |
| <b>7</b>    | thapsigargin     | 0.00004        |                                |
| <b>8</b>    | anisomycin       | 0.00004        |                                |
| <b>9</b>    | pimozide         | 0.00004        |                                |
| <b>10</b>   | perphenazine     | 0.00004        |                                |

**Supplementary Table 2: qRT-PCR primers used in this study.**

| <b>Gene</b>         | <b>Forward Primer Sequence</b> | <b>Reverse Primer Sequence</b> |
|---------------------|--------------------------------|--------------------------------|
| <b>ACTB</b>         | TTGCCGACAGGATGCAGAAGGA         | AGGTGGACAGCGAGGCCAGGAT         |
| <b>AR</b>           | CTCACCAAGCTCCTGGACTC           | CAGGCAGAAGACATCTGAAAG          |
| <b>CAMKK2</b>       | TGAAGACCAGGCCCGTTTCTAC<br>TT   | TGGAAGGTTTGATGTCACGGTGG<br>A   |
| <b>DSC2</b>         | GCCAAGAGAAGATGGGCTCC           | TTGGGCCGTGTCAGATTGAA           |
| <b>FBXO9</b>        | GGCAGAAGCTGAGGAAGATTG          | AACATCTGGAGTTGTGCCTGC          |
| <b>HNRNPH<br/>1</b> | CAGTTCAGCGACCACGTTTG           | CACCACGAATCCCTCTCCAC           |
| <b>KLK2</b>         | ATGTGTGCTAGAGCTTACTC           | AAGTGGACCCCCAGAATCAC           |
| <b>KLK3</b>         | AGAAGCATTCCCAACCCTG            | GTCGTGGCTGGAGTCATC             |
| <b>MANEA</b>        | CGCGGTCTTAACCTCTCCTC           | TCCTTCTCCGAAACTTTGCCA          |
| <b>NKX3.1</b>       | AGAAGGCCTCCTCTTTCAGG           | GCCAAGAACCTCAAGCTCAC           |
| <b>OR51E1</b>       | TTCCATACGGTTGAGCCTCT           | CCAACCAGAACTGAGCCTCT           |
| <b>PRKAA1</b>       | TTGAAACCTGAAAATGTCCTGC<br>T    | GGTGAGCCACAACCTTGTTCTT         |
| <b>PRKAA2</b>       | ACCAGGTGATCAGCACTCCA           | TCTCTTCAACCCGTCCATGC           |
| <b>PRR15L</b>       | CTTGCTTCCCGAGTCTCACC           | GGGCTTTCTGTAATCCCGAC           |
| <b>SDH</b>          | TGGGAACAAGAGGGCATCTG           | CCACCACTGCATCAAATTCATG         |
| <b>TMPRSS2</b>      | CCATTTGCAGGATCCGTCTG           | GGATGTGTCTTGGGGAGCAA           |
